# Supplementary material
Source: PubMed Central journal article supplement (PMC2676967)
Supplement: supp_71_20_1594__1.pdf [file supp_71_20_1594__1.pdf]

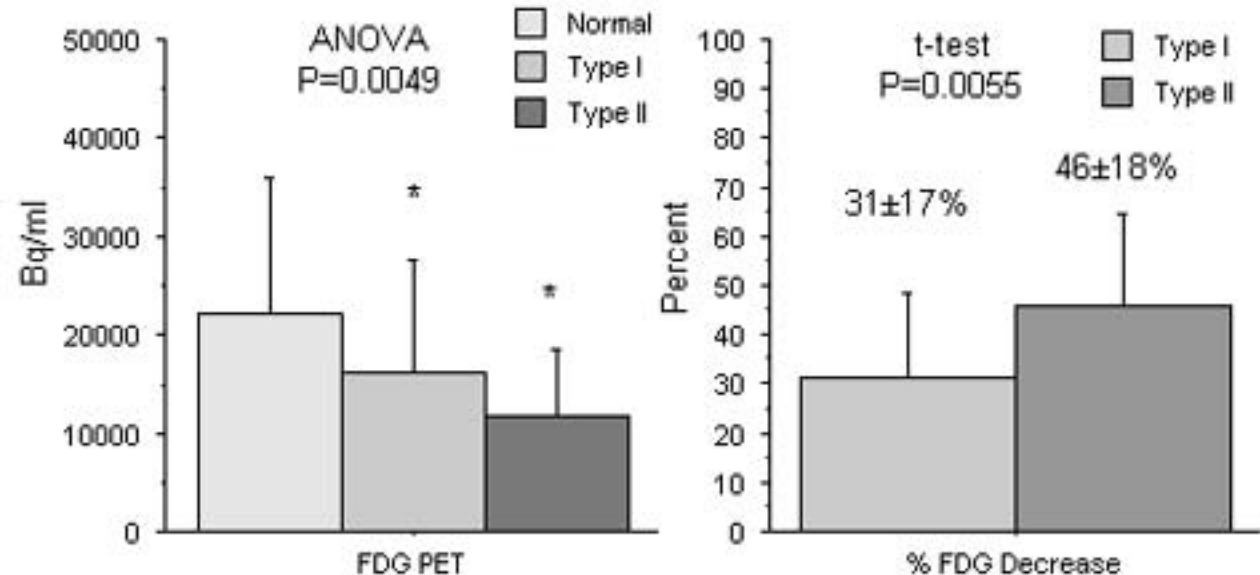

Figure E-1: Bar graphs showing the mean ( $\pm$  SD) FDG-PET Becquerel units per milliliter (Bq/ml) from contralateral normal regions (Normal) and areas confirmed by histopathology to show Type I and Type II CD. **Left Graph:** ANOVA indicated that there was a difference between Normal, Type I, and Type II CD ( $P=0.0049$ ), with Type I (Post-hoc;  $P=0.046$ ) and Type II ( $P=0.0017$ ) less than Normal (asterisks). **Right Graph:** Compared against the homotopic region in the contralateral brain (Normal), the percentage decrease was less for Type I compared with Type II CD ( $P=0.0055$ ).
